# Supplementary material
Source: Springer Nature journal article supplement (https://www.springermedizin.de/resource/supplementary/12916_2006_103_MOESM4_ESM.pdf/9599212)
Supplement: MOESM4 [file 9599212]

## Tables

**Table 1 - Characteristics for participants (adults and adolescents)**

| Variables                                     | Adults   |      | Men  |      | Women    |      | Adolescents |     |
|-----------------------------------------------|----------|------|------|------|----------|------|-------------|-----|
|                                               | <i>n</i> | (%)  | (%)  | (%)  | <i>n</i> | (%)  | <i>n</i>    | (%) |
| Sex                                           |          |      |      |      |          |      |             |     |
| Male                                          | 199      | (48) | —    | —    | 205      | (47) |             |     |
| Female                                        | 213      | (52) | —    | —    | 234      | (53) |             |     |
| LBP variables                                 |          |      |      |      |          |      |             |     |
| LBP month                                     | —        | —    |      |      | 98       | (22) |             |     |
| LBP year                                      | 289      | (70) | (70) | (70) | 182      | (41) |             |     |
| LBP ever                                      | 352      | (85) | (85) | (85) | —        | —    |             |     |
| Fat infiltration in LMM in at least one level |          |      |      |      |          |      |             |     |
| Grade 0 (none)                                | 78       | (19) | (29) | (10) | 379      | (86) |             |     |
| Grade 1 (slight)                              | 293      | (71) | (63) | (79) | 60       | (14) |             |     |
| Grade 2 (severe)                              | 41       | (10) | (9)  | (11) | 0        | (0)  |             |     |
| Body weight                                   |          |      |      |      |          |      |             |     |
| Normal                                        | 234      | (57) | (46) | (68) | 369      | (84) |             |     |
| Overweight                                    | 131      | (32) | (47) | (18) | 56       | (13) |             |     |
| Obese                                         | 44       | (11) | (8)  | (14) | 11       | (3)  |             |     |
| Workload                                      |          |      |      |      |          |      |             |     |
| Sedentary                                     | 89       | (22) | (20) | (24) | —        | —    |             |     |
| Sedentary/walking                             | 144      | (35) | (30) | (40) | —        | —    |             |     |
| Light physical                                | 92       | (22) | (19) | (26) | —        | —    |             |     |
| Heavy physical                                | 84       | (21) | (31) | (11) | —        | —    |             |     |
| Physical activity                             |          |      |      |      |          |      |             |     |
| Not active                                    | 59       | (14) | (12) | (17) | —        | —    |             |     |
| Walking/cycling >4 hours                      | 204      | (50) | (48) | (51) | —        | —    |             |     |
| Active sports > 3 hours                       | 140      | (34) | (38) | (31) | —        | —    |             |     |
| Competitive sports                            | 9        | (2)  | (3)  | (2)  | —        | —    |             |     |
| Weekly hours of sports activity               |          |      |      |      |          |      |             |     |
| <2                                            | 91       | (22) | (27) | (18) | 117      | (27) |             |     |
| 2 – 4                                         | 107      | (26) | (23) | (29) | 120      | (27) |             |     |
| 4 – 6                                         | 103      | (25) | (24) | (26) | 97       | (22) |             |     |
| >6                                            | 111      | (27) | (27) | (27) | 92       | (19) |             |     |
| Daily bicycling                               |          |      |      |      |          |      |             |     |
| Not every day                                 | —        | —    | —    | —    | 66       | (15) |             |     |
| Every day                                     | —        | —    | —    | —    | 370      | (85) |             |     |

LBP, lower back pain; LMM, lumbar multifidus muscles.
